# Supplementary material for: Quantifying Selection with Pool-Seq Time Series Data
Source: PubMed Central journal article supplement (PMC5850601; doi:10.1093/molbev/msx225), 2017-08-21
Supplement: msx225_supp.pdf [file msx225_supp.pdf]

## Supplementary Results

**Table S1: Runtimes in seconds per locus for LLS, CLEAR and WFABC.** Allele frequency trajectories were simulated for 10,000 loci assuming 100/300/1,000  $N_e$ ,  $p_0 = 0.05$  and drawing  $s$  from a uniform distribution between 0 and 0.3. Then  $s$  was estimated with LLS, CLEAR and WFABC and the average runtime in seconds per locus was computed. WFABC was applied to 100 trajectories only to reduce the overall processing time.

|       | <b>Ne = 100</b> | <b>Ne = 300</b> | <b>Ne = 1,000</b> |
|-------|-----------------|-----------------|-------------------|
| LLS   | 0.0014          | 0.0015          | 0.0015            |
| CLEAR | 0.04            | 0.10            | 0.77              |
| WFABC | 1.3             | 1.4             | 1.5               |

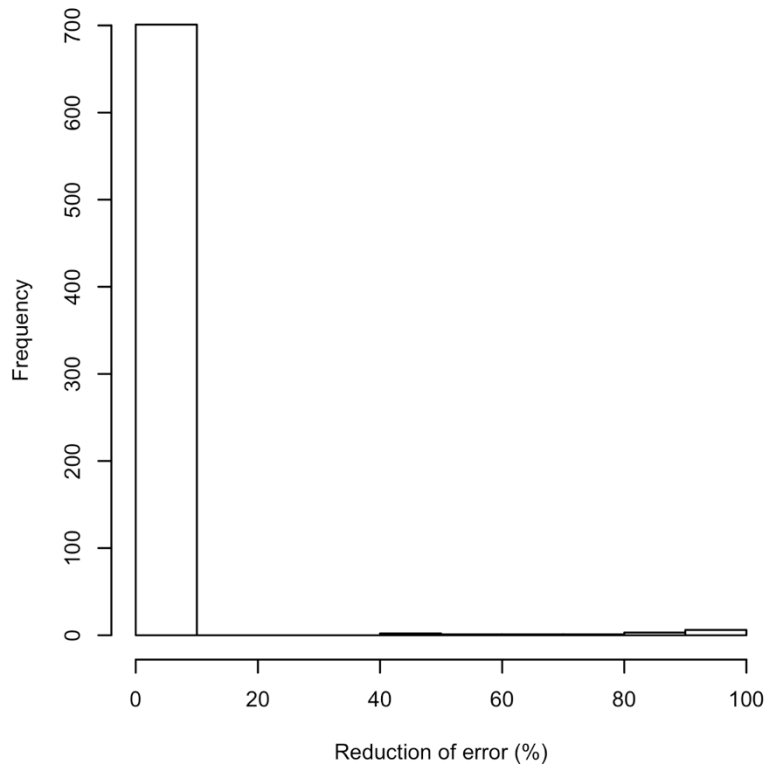

**Figure S1: Robustness of NLS to local optima.** Selection coefficients and dominance parameters were re-estimated with NLS for simulated trajectories which gave rise to extreme (top 1%) errors in Fig. 3. To estimate parameters, NLS by default optimizes the sum of squares starting with  $s = 0.1$  and  $h = 0.5$ . Here, different starting values were used for  $s$  and  $h$ , and the relative improvement based on the most accurate estimate is shown. For the vast majority of the 715 considered outlier loci, no or only little improvement was possible.

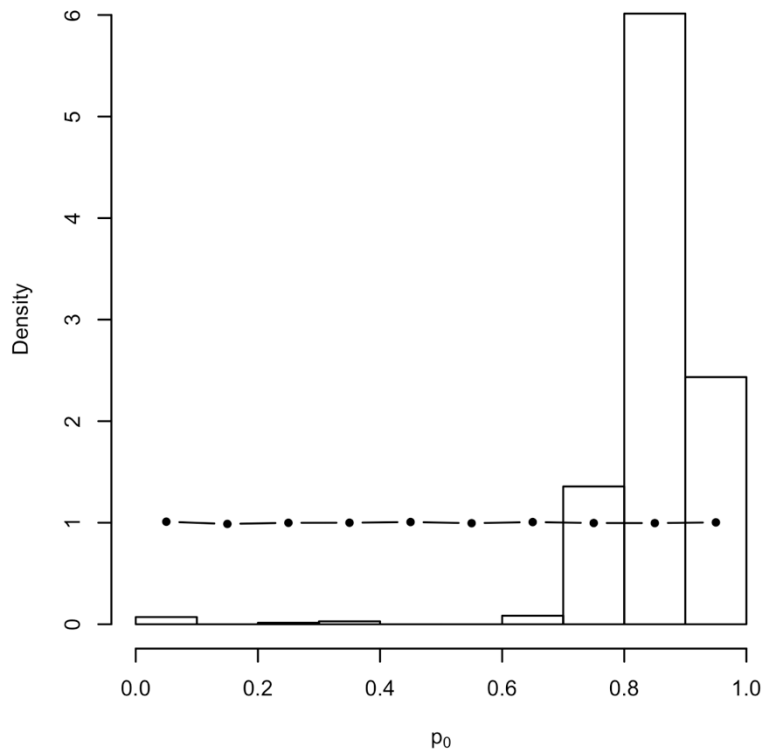

**Figure S2: Extreme outliers with NLS were mostly encountered with large starting allele frequencies.** The distribution of  $p_0$  is shown for trajectories that resulted in extreme (top 1%) outliers with NLS in the simulations leading to Fig 3. The black reference line displays the uniform distribution of  $p_0$  across all 100,000 simulated loci.

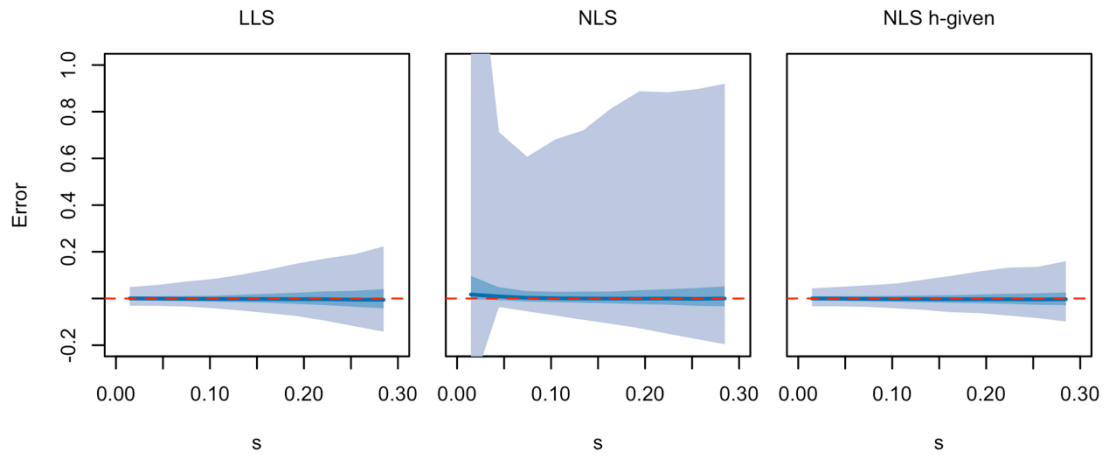

**Figure S3: Precision of NLS improves dramatically when  $h$  is given.** Allele frequency trajectories were simulated in six replicates for 100,000 unlinked loci over 60 generations assuming  $N_e = 300$  with  $p_0 \in [0,1]$ ,  $s \in [0,0.3]$  and  $h = 0.5$ . Selection coefficients were estimated with LLS and NLS, with the latter co-estimating  $h$ . Additionally, we applied NLS assuming that  $h = 0.5$  is known (NLS h-given). The median (dark blue), 25% to 75% quantile (light blue) and 2.5% to 97.5% quantile (grey) of absolute errors between true and estimated selection coefficient are shown as a function of  $s$ . The figure suggests that it is considerably more difficult to estimate  $s$  and  $h$  simultaneously.

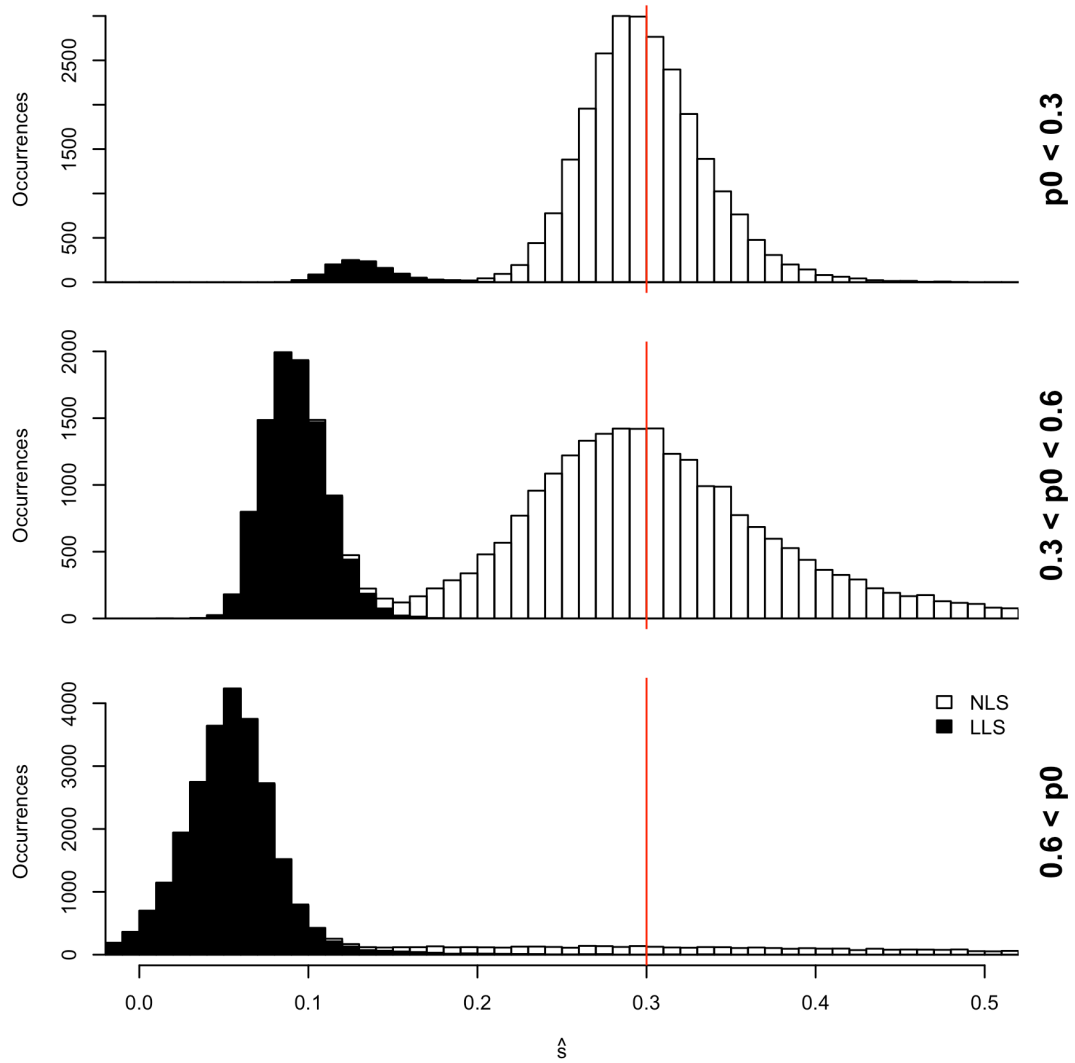

**Figure S4: Specificity of automated switching between LLS and NLS best for  $p_0 < 0.3$ .** Replicated allele frequency trajectories were simulated with  $s = 0.3$  and  $h = 1$ . Selection coefficients were estimated automatically switching between LLS and NLS. The distribution of estimates obtained is shown for different ranges of  $p_0$ . The red line indicates the true parameter value.

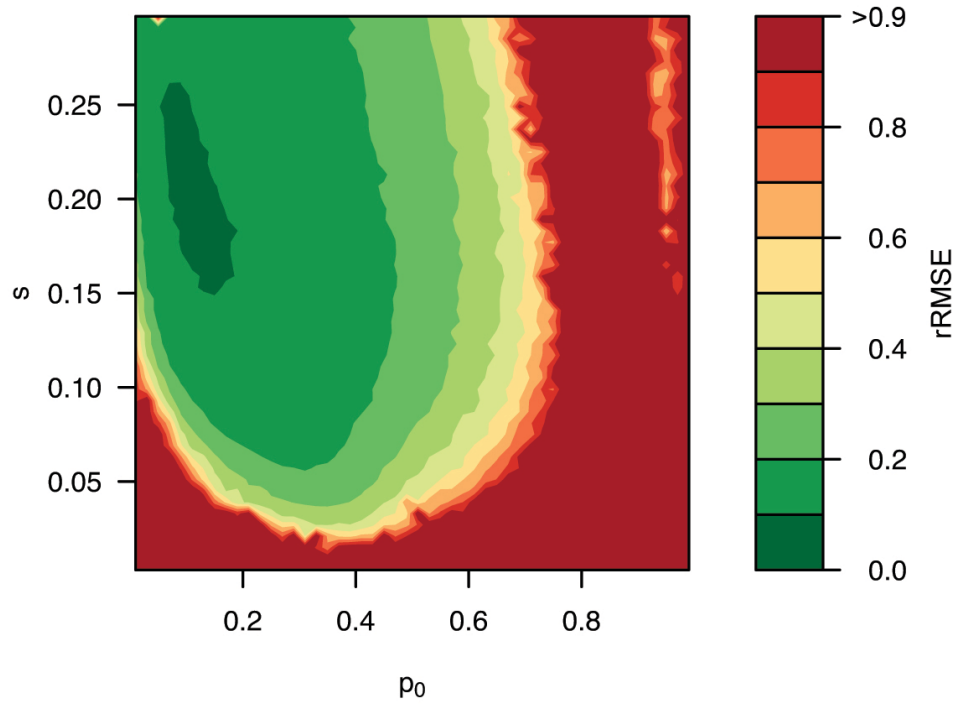

**Figure S5: Accuracy of  $s$ -estimates with the automatic switching method.** Allele frequency trajectories were simulated under an E&R scenario and selection coefficients were estimated automatically switching between LLS and NLS. The accuracy of the method was quantified based on the CV.

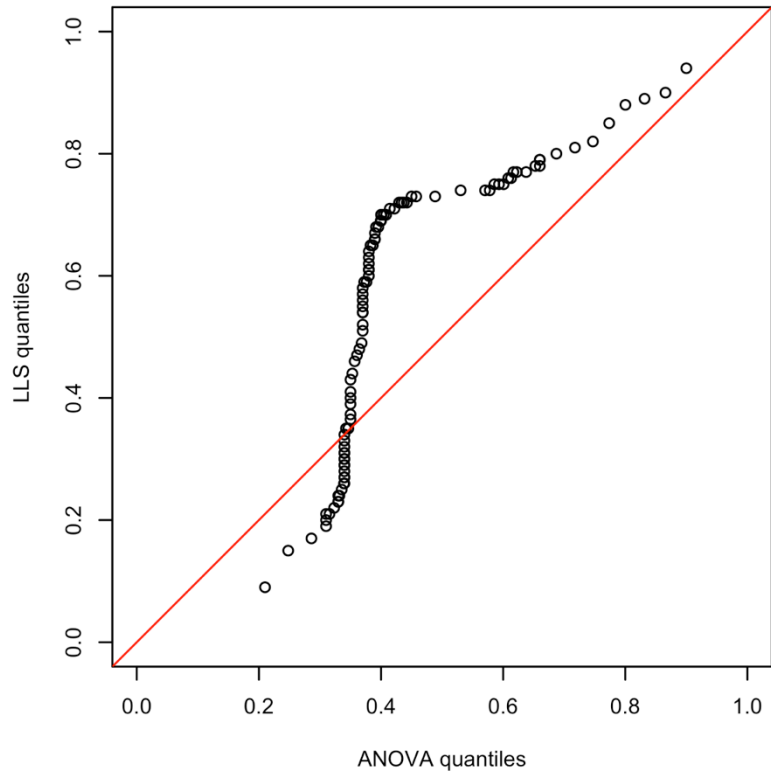

**Figure S6: LLS provides more power to detect selected alleles with low and high  $p_0$ .** We show a QQ-plot to compare the distributions of starting allele frequencies between significant loci identified with LLS and those reported in supplementary table S2 of Burke et al. 2014 (ANOVA).

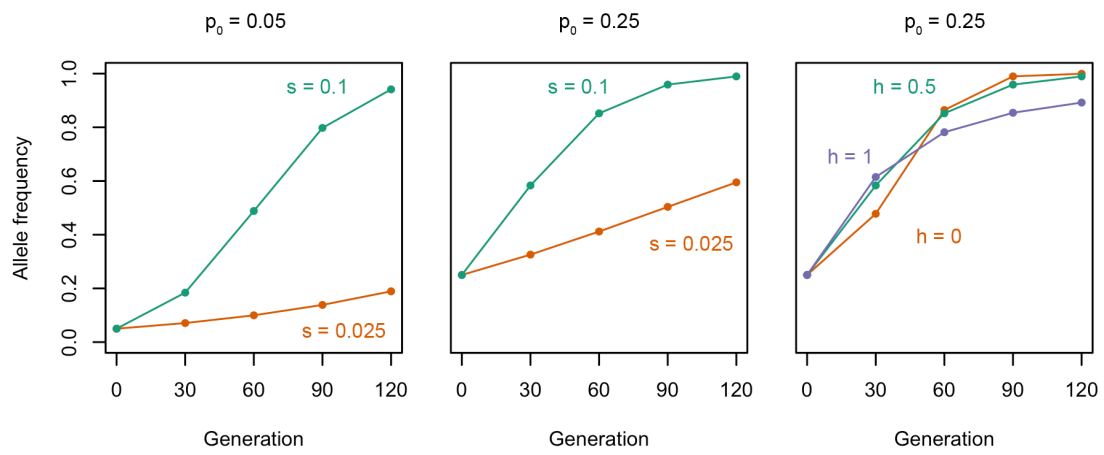

**Figure S7: Deterministic allele frequency trajectories.** Considering an infinitely large population, allele frequency trajectories were computed for various combinations of  $s$ ,  $p_0$  and  $h$ .



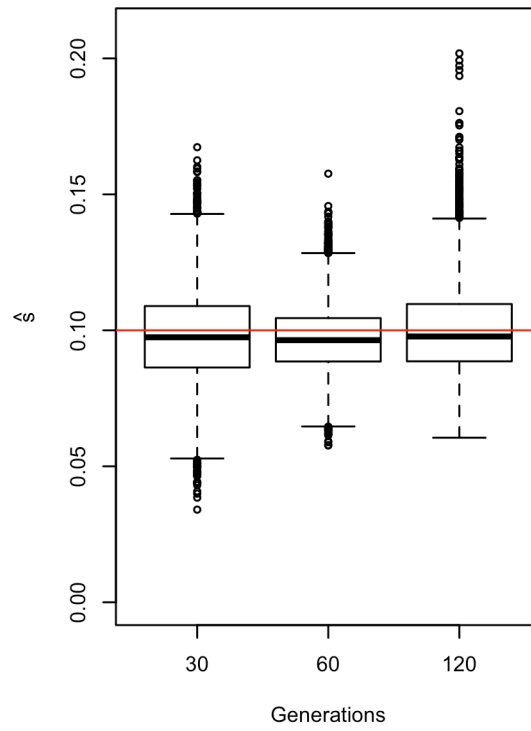

**Figure S8: Under strong selection accuracy stagnates with increasing number of generations.** Allele frequency trajectories were simulated for  $s = 0.1$  and  $p_0 = 0.25$  for 30, 60 and 120 generations. Then  $s$  was estimated with LLS.

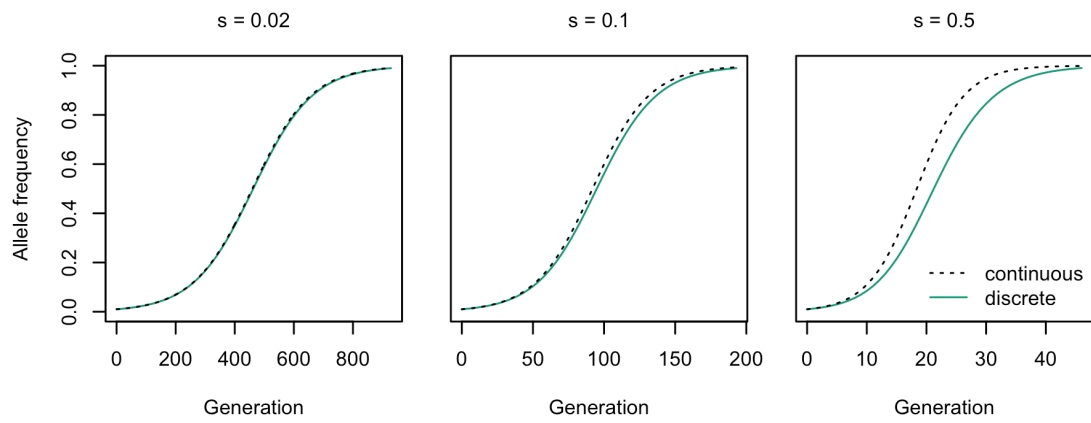

**Figure S9: Deviation between discrete and continuous models for various strengths of selection.** Assuming an infinitely large population, selection on an allele starting from 1% was simulated using both a discrete and continuous model (overlapping generations). Allele frequency trajectories for selection coefficients of 0.02, 0.1 and 0.5 were simulated.

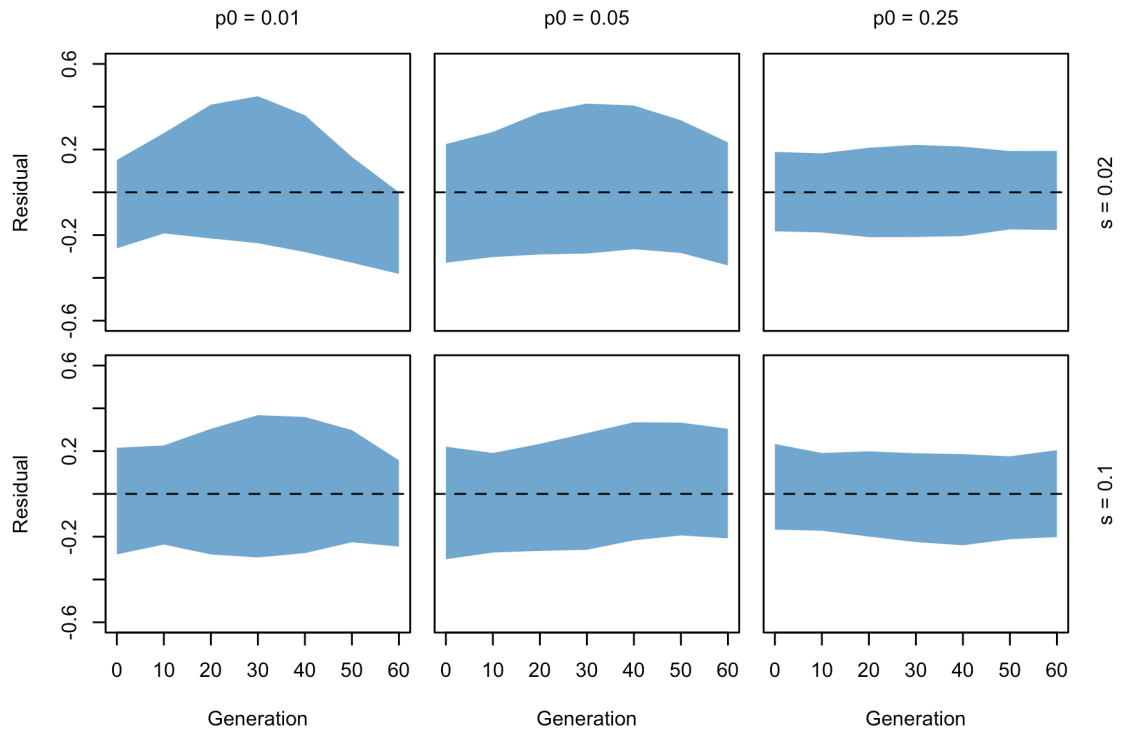

**Figure S10: Residual error of LLS.** Allele frequency trajectories were simulated for different values of  $p_0$  and  $s$ , assuming that  $N_e$  equals 300. The residual error (50% band) is shown after fitting a linear least squares model to logit-transformed allele frequencies.

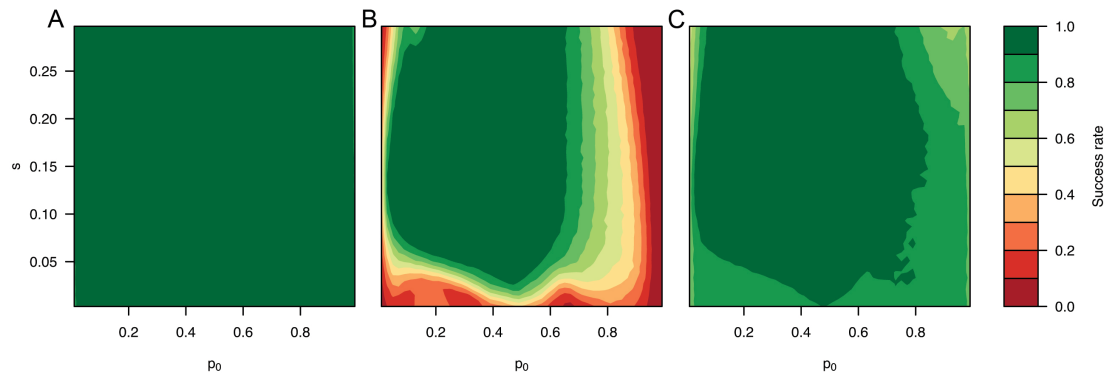

**Figure S11: Success rate of LLS, NLS and the automatic switching method under a state-of-the-art E&R experiment.** Allele frequency trajectories were simulated in six replicates for 10 million unlinked loci over 60 generations assuming  $N_e = 300$  with  $p_0 \in [0,1]$  and  $s \in [0,0.3]$ . Selection coefficients were estimated with LLS (A), NLS (B) or the automatic switching method (C). Estimates were divided into 2,500 bins based on  $p_0$  and  $s$ . For each bin the fraction of loci, for which selection estimates could be obtained, (success rate) was computed. Illustrated are the color-coded success rates for each region of the parameter space, with green and red corresponding to high and low rate of success, respectively.
